# Supplementary material for: Focus on the Protein Fraction of Sports Nutrition Supplements
Source: MDPI journal article supplement (doi:10.3390/molecules27113487), 2022-05-28
Supplement: s1 [file s1]

**Supplementary Table S1.** Labelled composition of commercial powdered sport supplements (PSS).

| <b>Sample</b> | <b>Protein<br/>(g/100g)</b> | <b>Lipids<br/>(g/100g)</b> | <b>Lactose<br/>(g/100g)</b> | <b>Ash<br/>(g/100g)</b> | <b>Moisture<br/>(g/100g)</b> |
|---------------|-----------------------------|----------------------------|-----------------------------|-------------------------|------------------------------|
| A47           | 85.5                        | 2.4                        | 0.7                         | 5.2                     | 6.1                          |
| C64 *         | 79.3                        | 1.4                        | 0.0                         | 5.4                     | 6.4                          |
| Y08           | 68.2                        | 3.8                        | 7.2                         | 4.8                     | 6.7                          |
| S15           | 92.8                        | 0                          | 0                           | 2.3                     | 3.3                          |
| L03           | 87.3                        | 0                          | 0                           | 6.2                     | 5.5                          |

\* Commercial label indicates that the powder contains 5.7g/100g maltodextrin

**Supplementary Table S2.** Content of total (TAA) and free (FAA) amino acids (g/100g product) of commercial powdered sport supplements (PSS) and reference samples (Reference). Data are the mean  $\pm$  StdDev of duplicate analyses of n=3 batches for each commercial PSS and of n=4 batches of reference samples. Different superscript letters (a-f) within row indicate significant differences ( $p < 0.05$ ; Tukey's test).

| Sample | PSS                         |               |                             |               |                             |               |                             |                |                             |               | Reference                   |               |                             |               |                             |               |
|--------|-----------------------------|---------------|-----------------------------|---------------|-----------------------------|---------------|-----------------------------|----------------|-----------------------------|---------------|-----------------------------|---------------|-----------------------------|---------------|-----------------------------|---------------|
|        | A47                         |               | C64                         |               | Y08                         |               | S15                         |                | L03                         |               | WPI                         |               | WPC35                       |               | WP                          |               |
|        | TAA                         | FAA           | TAA                         | FAA           | TAA                         | FAA           | TAA                         | FAA            | TAA                         | FAA           | TAA                         | FAA           | TAA                         | FAA           | TAA                         | FAA           |
| Asp    | 9.9 $\pm$ 0.4 <sup>a</sup>  | ----          | 8.9 $\pm$ 0.3 <sup>ab</sup> | ----          | 3.7 $\pm$ 0.1 <sup>c</sup>  | ----          | 7.8 $\pm$ 0.2 <sup>b</sup>  | ----           | 7.7 $\pm$ 0.2 <sup>b</sup>  | ----          | 9.8 $\pm$ 1.1 <sup>a</sup>  | ----          | 2.4 $\pm$ 0.4 <sup>c</sup>  | ----          | 0.8 $\pm$ 0.0 <sup>d</sup>  | ----          |
| Thr    | 6.6 $\pm$ 0.4 <sup>ab</sup> | ----          | 5.8 $\pm$ 0.3 <sup>ac</sup> | ----          | 2.3 $\pm$ 0.1 <sup>d</sup>  | ----          | 5.3 $\pm$ 0.5 <sup>c</sup>  | ----           | 5.0 $\pm$ 0.2 <sup>c</sup>  | ----          | 6.7 $\pm$ 0.4 <sup>b</sup>  | ----          | 2.2 $\pm$ 0.3 <sup>d</sup>  | ----          | 0.7 $\pm$ 0.0 <sup>e</sup>  | ----          |
| Ser    | 4.7 $\pm$ 0.1 <sup>a</sup>  | ----          | 4.1 $\pm$ 0.1 <sup>b</sup>  | ----          | 1.9 $\pm$ 0.0 <sup>c</sup>  | ----          | 3.6 $\pm$ 0.2 <sup>d</sup>  | ----           | 4.3 $\pm$ 0.1 <sup>ab</sup> | ----          | 4.3 $\pm$ 0.3 <sup>ab</sup> | ----          | 1.9 $\pm$ 0.0 <sup>c</sup>  | ----          | 0.6 $\pm$ 0.0 <sup>e</sup>  | ----          |
| Glu    | 15.6 $\pm$ 0.7 <sup>a</sup> | ----          | 13.8 $\pm$ 0.8 <sup>a</sup> | ----          | 6.4 $\pm$ 0.3 <sup>b</sup>  | ----          | 21.6 $\pm$ 1.9 <sup>c</sup> | 0.1 $\pm$ 0.0  | 15.2 $\pm$ 0.5 <sup>a</sup> | ----          | 20.4 $\pm$ 1.5 <sup>c</sup> | ----          | 5.4 $\pm$ 0.5 <sup>b</sup>  | ----          | 1.7 $\pm$ 0.2 <sup>d</sup>  | ----          |
| Gln    | 0.0 $\pm$ 0.0 <sup>a</sup>  | ----          | 0.0 $\pm$ 0.0 <sup>a</sup>  | ----          | 0.0 $\pm$ 0.0 <sup>a</sup>  | ----          | 0.0 $\pm$ 0.0 <sup>a</sup>  | 10.4 $\pm$ 0.4 | 0.0 $\pm$ 0.0 <sup>a</sup>  | ----          | 0.0 $\pm$ 0.0 <sup>a</sup>  | 5.1 $\pm$ 0.5 | 0.0 $\pm$ 0.0 <sup>a</sup>  | ----          | 0.0 $\pm$ 0.0 <sup>a</sup>  | ----          |
| Gly    | 1.6 $\pm$ 0.1 <sup>a</sup>  | ----          | 1.4 $\pm$ 0.1 <sup>a</sup>  | ----          | 7.8 $\pm$ 0.3 <sup>b</sup>  | 2.6 $\pm$ 0.1 | 9.3 $\pm$ 1 <sup>c</sup>    | 4.1 $\pm$ 0.2  | 1.4 $\pm$ 0.0 <sup>a</sup>  | ----          | 1.4 $\pm$ 0.2 <sup>a</sup>  | ----          | 0.7 $\pm$ 0.0 <sup>ad</sup> | ----          | 0.2 $\pm$ 0.0 <sup>d</sup>  | ----          |
| Ala    | 4.7 $\pm$ 0.1 <sup>a</sup>  | ----          | 4.3 $\pm$ 0.1 <sup>a</sup>  | ----          | 2.1 $\pm$ 0.1 <sup>b</sup>  | ----          | 7.1 $\pm$ 0.6 <sup>c</sup>  | 3.2 $\pm$ 0.1  | 3.5 $\pm$ 0.1 <sup>d</sup>  | ----          | 4.4 $\pm$ 0.4 <sup>a</sup>  | ----          | 1.8 $\pm$ 0.2 <sup>b</sup>  | ----          | 0.6 $\pm$ 0.0 <sup>e</sup>  | ----          |
| Val    | 5.8 $\pm$ 0.3 <sup>a</sup>  | ----          | 5.1 $\pm$ 0.3 <sup>a</sup>  | ----          | 2.0 $\pm$ 0.0 <sup>b</sup>  | ----          | 4.2 $\pm$ 0.6 <sup>c</sup>  | ----           | 4.9 $\pm$ 0.2 <sup>ac</sup> | ----          | 5.2 $\pm$ 0.4 <sup>a</sup>  | ----          | 2.1 $\pm$ 0.3 <sup>b</sup>  | ----          | 0.7 $\pm$ 0.0 <sup>d</sup>  | ----          |
| Cys2   | 2.1 $\pm$ 0.3 <sup>a</sup>  | ----          | 1.9 $\pm$ 0.1 <sup>ab</sup> | ----          | 0.7 $\pm$ 0.0 <sup>c</sup>  | ----          | 1.5 $\pm$ 0.2 <sup>bd</sup> | ----           | 1.3 $\pm$ 0.0 <sup>d</sup>  | ----          | 2.1 $\pm$ 0.3 <sup>a</sup>  | ----          | 0.6 $\pm$ 0.0 <sup>c</sup>  | ----          | 0.1 $\pm$ 0.0 <sup>e</sup>  | ----          |
| Met    | 1.9 $\pm$ 0.3 <sup>a</sup>  | ----          | 1.6 $\pm$ 0.0 <sup>a</sup>  | ----          | 0.6 $\pm$ 0.0 <sup>b</sup>  | ----          | 1 $\pm$ 0.8 <sup>ab</sup>   | ----           | 1.7 $\pm$ 0.1 <sup>a</sup>  | ----          | 1.8 $\pm$ 0.2 <sup>a</sup>  | ----          | 0.7 $\pm$ 0.0 <sup>b</sup>  | ----          | 0.2 $\pm$ 0.0 <sup>b</sup>  | ----          |
| Ile    | 6.4 $\pm$ 0.1 <sup>a</sup>  | ----          | 5.5 $\pm$ 0.0 <sup>b</sup>  | ----          | 2.1 $\pm$ 0.1 <sup>c</sup>  | ----          | 4.3 $\pm$ 0.2 <sup>d</sup>  | ----           | 4.8 $\pm$ 0.2 <sup>d</sup>  | ----          | 6.0 $\pm$ 0.6 <sup>ab</sup> | ----          | 2.2 $\pm$ 0.1 <sup>c</sup>  | ----          | 0.7 $\pm$ 0.0 <sup>e</sup>  | ----          |
| Leu    | 9.7 $\pm$ 0.2 <sup>a</sup>  | ----          | 8.9 $\pm$ 0.2 <sup>ab</sup> | 0.2 $\pm$ 0.0 | 3.6 $\pm$ 0.2 <sup>c</sup>  | ----          | 7.7 $\pm$ 0.4 <sup>d</sup>  | ----           | 8.3 $\pm$ 0.3 <sup>bd</sup> | ----          | 9.2 $\pm$ 0.9 <sup>ab</sup> | ----          | 3.6 $\pm$ 0.4 <sup>c</sup>  | ----          | 1.1 $\pm$ 0.0 <sup>e</sup>  | ----          |
| Tyr    | 2.5 $\pm$ 0.1 <sup>a</sup>  | ----          | 2.2 $\pm$ 0.1 <sup>b</sup>  | 0.2 $\pm$ 0.0 | 0.1 $\pm$ 0.0 <sup>c</sup>  | ----          | 1.9 $\pm$ 0.1 <sup>d</sup>  | ----           | 1.0 $\pm$ 0.0 <sup>e</sup>  | ----          | 2.4 $\pm$ 0.2 <sup>ab</sup> | ----          | 0.8 $\pm$ 0.0 <sup>e</sup>  | ----          | 0.2 $\pm$ 0.0 <sup>c</sup>  | ----          |
| Phe    | 2.7 $\pm$ 0.1 <sup>a</sup>  | ----          | 2.5 $\pm$ 0.1 <sup>a</sup>  | ----          | 1.3 $\pm$ 0.0 <sup>b</sup>  | ----          | 2.1 $\pm$ 0.2 <sup>c</sup>  | ----           | 3.0 $\pm$ 0.1 <sup>d</sup>  | ----          | 2.5 $\pm$ 0.1 <sup>a</sup>  | ----          | 1.1 $\pm$ 0.1 <sup>b</sup>  | ----          | 0.3 $\pm$ 0.0 <sup>e</sup>  | ----          |
| Lys    | 9.2 $\pm$ 0.5 <sup>a</sup>  | ----          | 8.3 $\pm$ 0.3 <sup>a</sup>  | ----          | 3.1 $\pm$ 0.1 <sup>b</sup>  | ----          | 10.4 $\pm$ 0.4 <sup>c</sup> | 3.4 $\pm$ 0.1  | 7.0 $\pm$ 0.2 <sup>d</sup>  | ----          | 8.2 $\pm$ 0.9 <sup>a</sup>  | ----          | 3.2 $\pm$ 0.2 <sup>b</sup>  | ----          | 1.0 $\pm$ 0.1 <sup>e</sup>  | ----          |
| His    | 1.5 $\pm$ 0.0 <sup>ab</sup> | ----          | 1.3 $\pm$ 0 <sup>bd</sup>   | ----          | 0.7 $\pm$ 0.0 <sup>c</sup>  | ----          | 1.1 $\pm$ 0.1 <sup>d</sup>  | ----           | 1.6 $\pm$ 0.0 <sup>a</sup>  | ----          | 1.3 $\pm$ 0.2 <sup>bd</sup> | ----          | 0.8 $\pm$ 0.0 <sup>c</sup>  | ----          | 0.2 $\pm$ 0.0 <sup>e</sup>  | ----          |
| Arg    | 1.9 $\pm$ 0.0 <sup>a</sup>  | ----          | 1.7 $\pm$ 0 <sup>a</sup>    | ----          | 1.3 $\pm$ 0.1 <sup>b</sup>  | ----          | 1.4 $\pm$ 0 <sup>b</sup>    | ----           | 2.4 $\pm$ 0.1 <sup>c</sup>  | ----          | 2.9 $\pm$ 0.1 <sup>d</sup>  | 1 $\pm$ 0.0   | 1.0 $\pm$ 0.0 <sup>e</sup>  | ----          | 0.3 $\pm$ 0.0 <sup>f</sup>  | ----          |
| Pro    | 6.0 $\pm$ 0.1 <sup>ab</sup> | ----          | 5.0 $\pm$ 0.2 <sup>c</sup>  | ----          | 2.7 $\pm$ 0.1 <sup>d</sup>  | ----          | 4.2 $\pm$ 0.2 <sup>e</sup>  | ----           | 6.5 $\pm$ 0.2 <sup>a</sup>  | ----          | 5.4 $\pm$ 0.5 <sup>bc</sup> | ----          | 2.1 $\pm$ 0.3 <sup>d</sup>  | ----          | 0.7 $\pm$ 0.0 <sup>f</sup>  | ----          |
| Total  | 92.6 $\pm$ 0.8 <sup>a</sup> | 0.0 $\pm$ 0.0 | 82.5 $\pm$ 1 <sup>b</sup>   | 0.4 $\pm$ 0.0 | 43.0 $\pm$ 2.2 <sup>c</sup> | 2.6 $\pm$ 0.1 | 94.6 $\pm$ 1 <sup>a</sup>   | 21.2 $\pm$ 0.8 | 79.6 $\pm$ 3.2 <sup>b</sup> | 0.0 $\pm$ 0.0 | 94.0 $\pm$ 6.2 <sup>a</sup> | 6.1 $\pm$ 0.8 | 32.5 $\pm$ 3.4 <sup>d</sup> | 0.0 $\pm$ 0.0 | 10.0 $\pm$ 1.3 <sup>e</sup> | 0.0 $\pm$ 0.0 |
